# Supplementary material for: Separation of 44Sc from Natural Calcium Carbonate Targets for Synthesis of 44Sc-DOTATATE
Source: PubMed Central journal article supplement (PMC6100303; doi:10.3390/molecules23071787), 2018-07-20
Supplement: molecules-23-01787-s001.pdf [file molecules-23-01787-s001.pdf]

## Supplementary materials

### Separation of $^{44}\text{Sc}$ from natural calcium carbonate targets for synthesis of $^{44}\text{Sc}$ -DOTATATE

Krzysztof Kilian, Łukasz Cheda, Mateusz Sitarz, Katarzyna Szkliniarz, Jarosław Choiński, Anna Stolarz

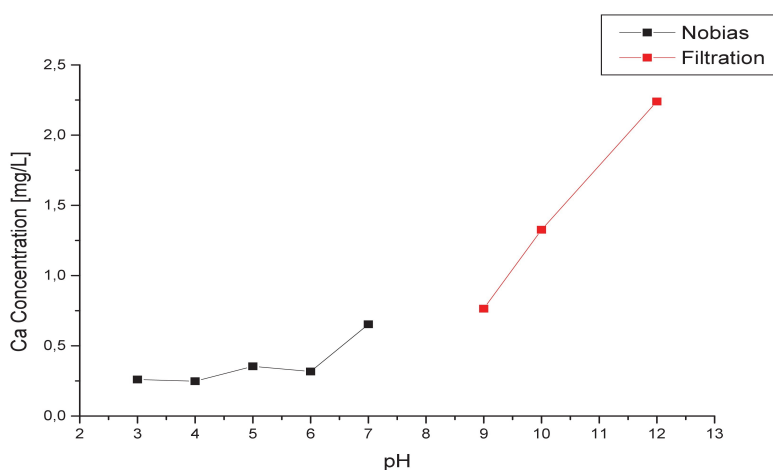

**Figure 1S.** pH dependence of Ca concentration in  $^{44}\text{Sc}$  solution after separation

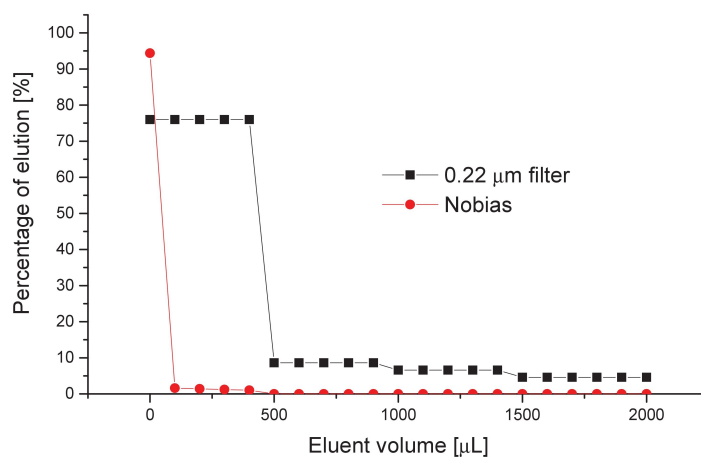

**Figure 2S.** Elution profiles of Nobias column and 0.22  $\mu\text{m}$  filter

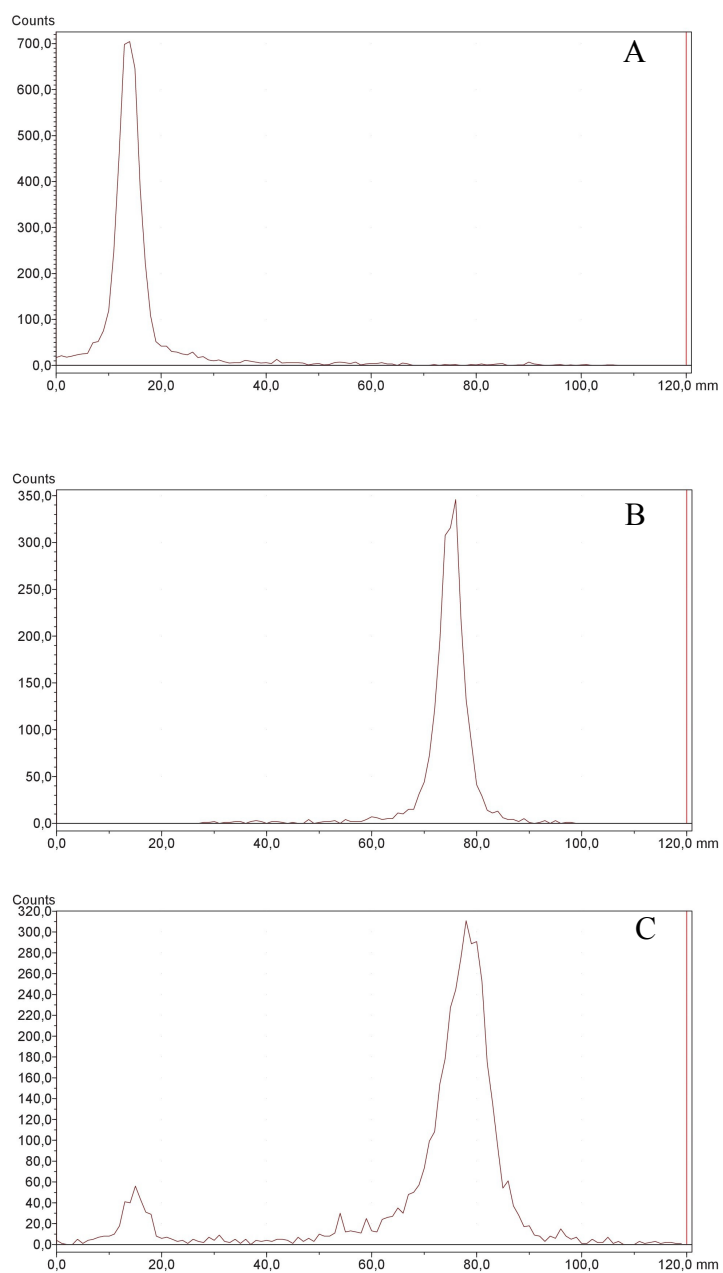

**Figure 3S.** Thin-layer chromatograms of **a)**  $^{44}\text{Sc}$ -DOTATATE,  $R_f=0.0-0.2$ ; **b)**  $^{44}\text{Sc}$   $R_f=0.7-1.0$ ; **c)** resolution test for the mixture of  $^{44}\text{Sc}$  and  $^{44}\text{Sc}$ -DOTATATE. Citrate buffer  $0.1 \text{ mol L}^{-1}$ ,  $\text{pH}=4.0$ .

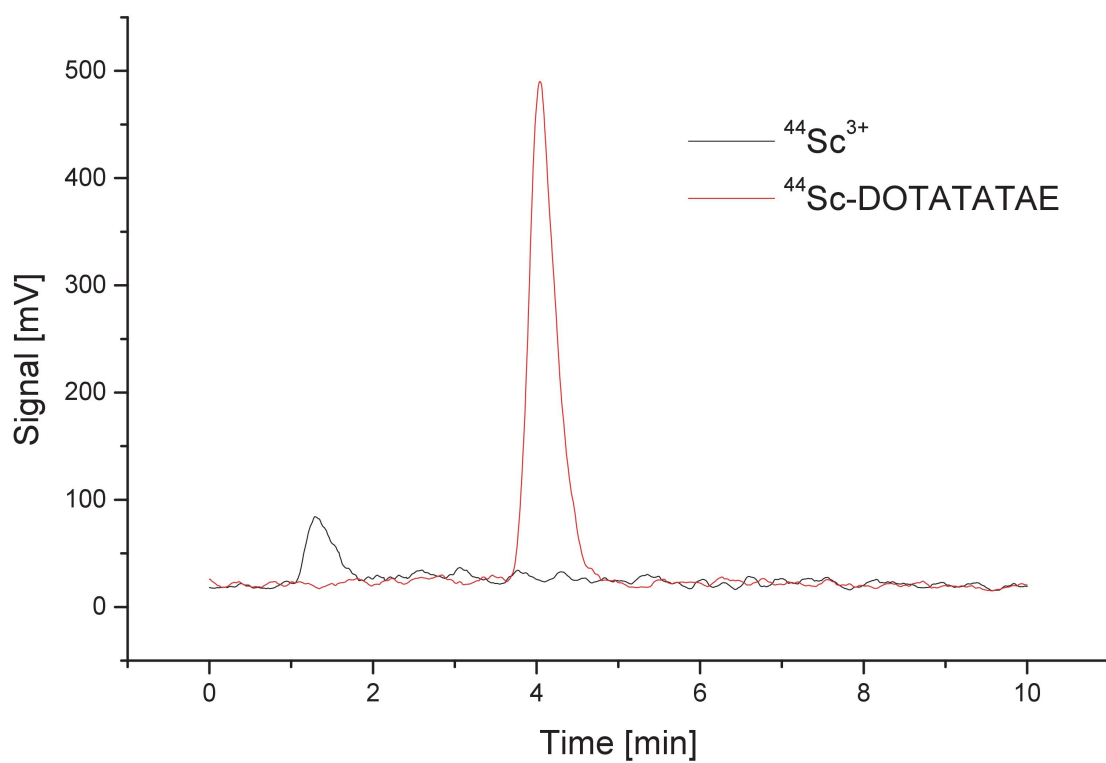

**Figure 4S.** Resolution test for  $^{44}\text{Sc}$  ( $t_r=1.7$  min) and  $^{44}\text{Sc-DOTATATE}$  ( $t_r=4.2$  min). Conditions: HPLC system Shimadzu AD20 with UV-Vis and radiometric detector GabiStar, Phenomenex Gemini C18 column (150 mm  $\times$  4.0 mm i.d., 5  $\mu\text{m}$ ), with 375:115:0.5 (v/v/v) water:acetonitrile:trifluoroacetic acid as a mobile phase and 1.5 mL/min flow rate.

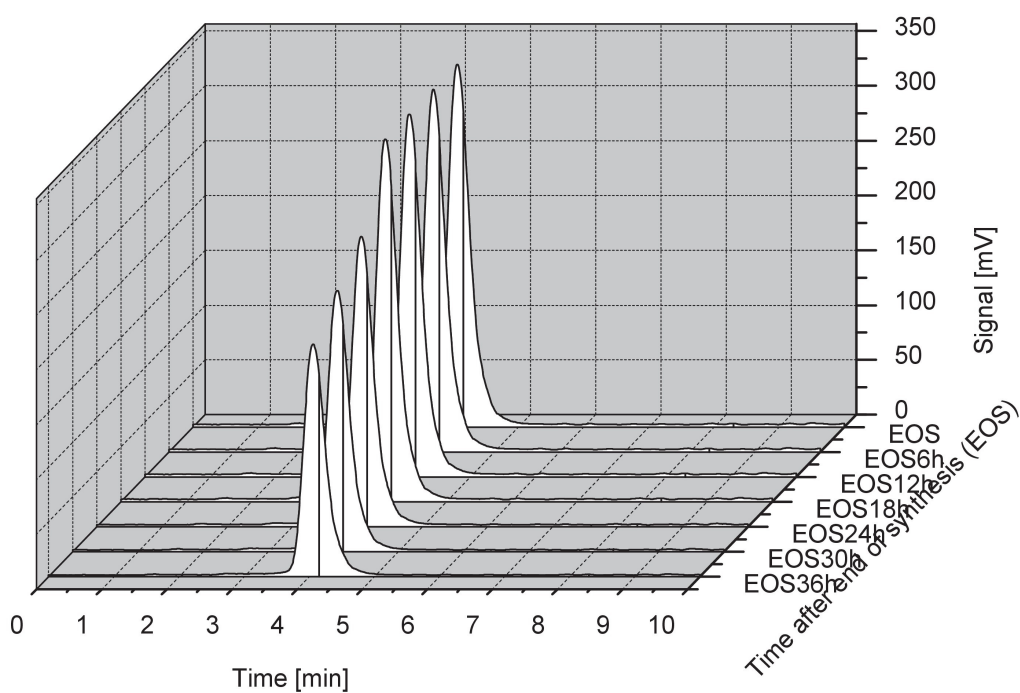

**Figure 5S.** Stability test for  $^{44}\text{Sc}$ -DOTATATE within 36 h after end of synthesis (EOS). Injection volume (2-100  $\mu\text{L}$ ) was adjusted to the decay of radioisotope to ensure the comparability of signals.

**Table 1S.**  $^{44}\text{Sc}$  labeling yields for DOTATATE at different ligand concentrations.  $t=95^\circ\text{C}$ , acetate buffer  $\text{pH}=4.0$ , 30 min.

| Ligand amount (nmol) | Yield [%] |
|----------------------|-----------|
| 28.6                 | 99.6      |
| 14.3                 | 99.6      |
| 7.1                  | 99.5      |
| 3.6                  | 99.5      |
| 0.71                 | 99.5      |
| 0.36                 | 99.3      |
| 0.07                 | 95.5      |

**Figure 6S.**  $\gamma$ -spectra of produced  $^{44}\text{Sc}$ . Radionuclidic purity >97%.

Aquisition: detector CANBERRA HPGGe model: BE2825; thickness: 25.5 mm; active area: 2800 mm<sup>2</sup>; window: Carbon Epoxy 0.6; measurement life time: 3568 s; measurement dead-time: 0.8%; frontal measurement; detector-sample distance: 5.5 cm

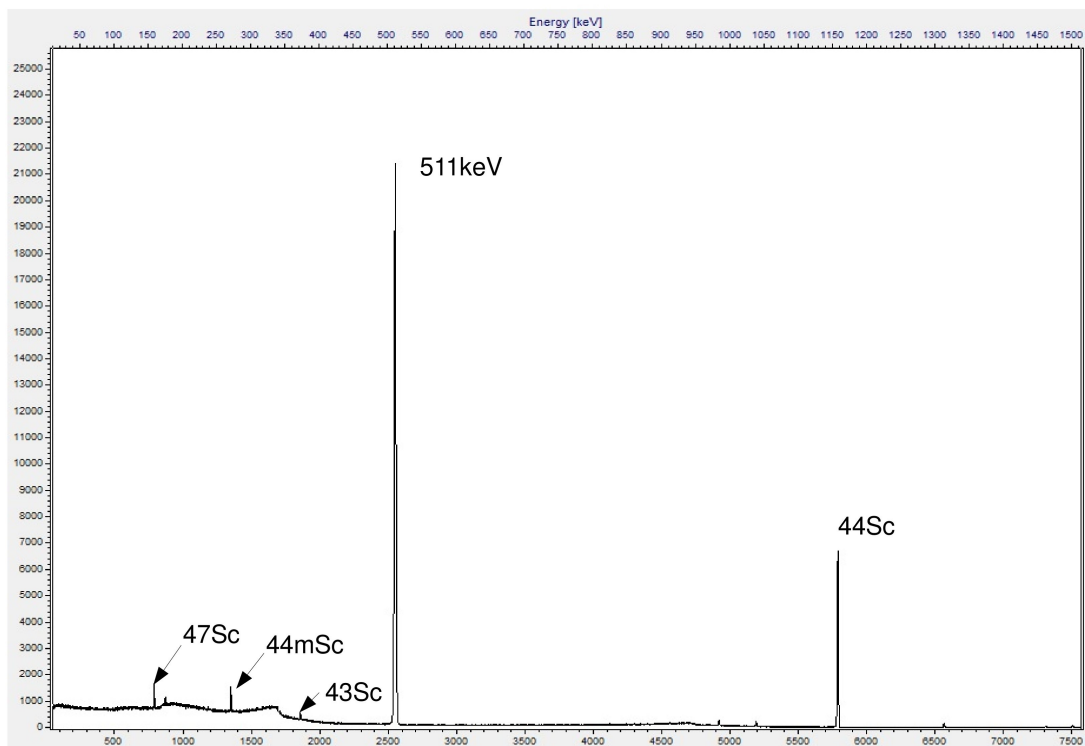

### Experimental data

| Irradiation date | Target            | mass [mg] | beam current | Labeling         |                              | Separation mode | Separation yield[%] | Labeling RCY[%] |                          |
|------------------|-------------------|-----------|--------------|------------------|------------------------------|-----------------|---------------------|-----------------|--------------------------|
|                  |                   |           |              | Irradiation time | Estimated Activity EOB [Mbq] |                 |                     |                 | Activity processed [Mbq] |
| 30.11.2017       | CaCO <sub>3</sub> | 89,005    | ~10 uA       | ~2h              | 179,1                        | 127             | Filtration          | 82,3            | 98,1                     |
| 6.12.2017        |                   | 87,232    |              |                  | 183,6                        | 125             | Filtration          | 78,5            | 99,0                     |
| 20.12.2017       |                   | 83,341    |              |                  | 207                          | 138             | Nobias              | 91,7            | 99,5                     |
| 21.02.2018       |                   | 90,831    |              |                  | 163,8                        | 91,3            | Nobias              | 97,4            | 99,1                     |
| 21.03.2018       |                   | 90,157    |              |                  | 205                          | 141             | Filtration          | 87,4            | 99,0                     |
| 28.03.2018       |                   | 89,901    |              |                  | 170                          | 95              | Filtration          | 47,8            | 98,5                     |
| 18.04.2018       |                   | 89,708    |              |                  | 200                          | 142,7           | Filtration          | 96,1            | 98,7                     |
| 25.04.2018       |                   | 87,465    |              |                  | 152,3                        | 87              | Nobias              | 94,4            | 98,9                     |
| 7.05.2018        |                   | 90,144    |              |                  | 188                          | 114,4           | Filtration          | 67,7            | 98,2                     |
| 16.05.2018       |                   | 86,689    |              |                  | 177                          | 116             | Nobias              | 92,4            | 99,6                     |
| 21.05.2018       |                   | 88,799    |              |                  | 151,8                        | 88,6            | Nobias              | 99,0            | 99,5                     |

  

| Sample   | Chemical purity [mg/L] |       |       |       |       |       |       |       |       |  |
|----------|------------------------|-------|-------|-------|-------|-------|-------|-------|-------|--|
|          | Al                     | Ca    | Cr    | Cu    | Fe    | Mn    | Ni    | Pb    | Zn    |  |
| Nobias 1 | 0,013                  | 0,302 | 0,001 | 0,002 | 0,003 | 0,014 | 0,025 | 0,063 | 0,037 |  |
| Nobias 2 | 0,004                  | 0,617 | 0,002 | 0,021 | 0,007 | 0,014 | 0,007 | 0,020 | 0,018 |  |
| Nobias 3 | 0,010                  | 0,105 | 0,001 | 0,049 | 0,006 | 0,014 | 0,006 | 0,007 | 0,039 |  |
| Average  | 0,009                  | 0,341 | 0,001 | 0,024 | 0,005 | 0,014 | 0,013 | 0,030 | 0,031 |  |
